# Supplementary material for: Sestrin2 Expression Has Regulatory Properties and Prognostic Value in Lung Cancer
Source: PubMed Central journal article supplement (PMC7565522; doi:10.3390/jpm10030109), 2020-09-01

**Supplement figure S1.** Expression of Sestrin2 (SESN2) in various cell lines measured by RT-PCR.

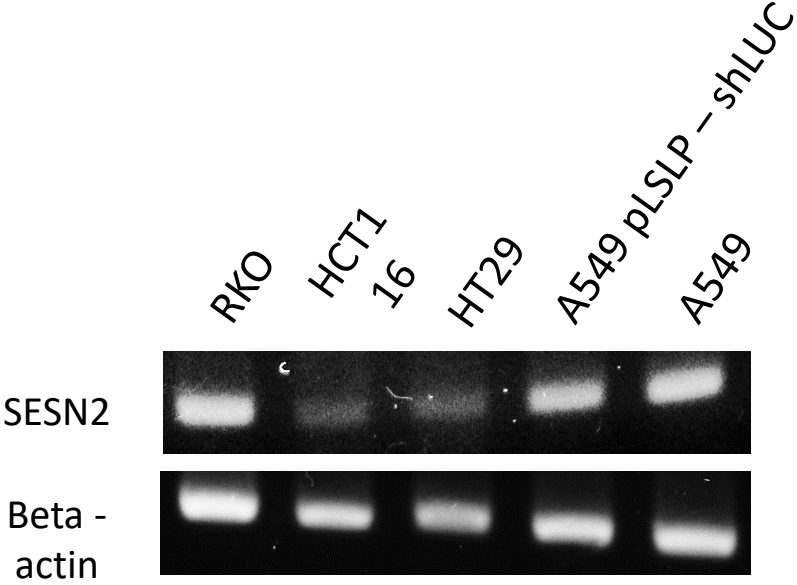

**Supplement figure S2.** Cell Proliferation assay of scramble, shSESN2-1, and shSESN2-2 cells. Cell viability was measured using EZ-cytox reagent at 1,2,3, and 4 day after seeding and incubating cells ( $1 \times 10^4$  per well in 96-well plate). The absorbance was measured at 450 nm using a fluorescence microplate reader

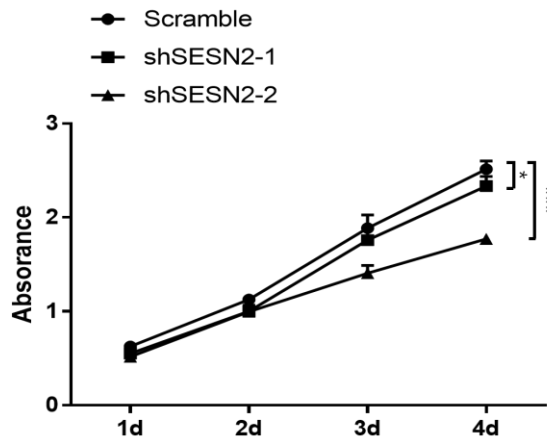

**Supplement figure S3.** Expression of NRF2 and HO1 by RT-PCR in knockdown A549 lung cancer cell.

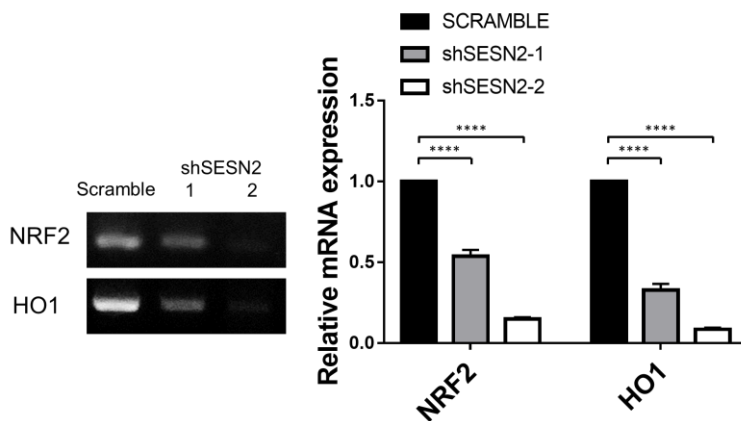

Supplement: jpm-10-00109-s001.pdf [file jpm-10-00109-s001.pdf]
